# Supplementary material
Source: HighWire-hosted journal article supplement (https://bibliotheek.ehb.be/content/suppl/2023/12/19/bmjonc-2023-000199)
Supplement: bmjonc-2023-000199supp001_data_supplement.pdf [file bmjonc-2023-000199supp001_data_supplement.pdf]

## Gender Disparities in Clinical Outcomes of Urothelial Carcinoma Linked to X Chromosome Gene *KDM6A* Mutation

**Running title:** *KDM6A* Linked Gender Disparities in UC

### Supplementary Materials

**Supplementary Figure 1.** Enrollment, clinicopathological features and inclusion criteria for FUSCC, ZSHS, TCGA, MSKCC, IMvigor210, UC-GENOME and MSKCC-IMPACT cohorts.

**Supplementary Figure 2.** Mutational landscape of *KDM6A* in UC.

**Supplementary Figure 3.** Immunohistochemistry characterization of *KDM6A*<sup>Mut</sup> samples.

**Supplementary Figure 4.** *KDM6A*<sup>Mut</sup> male patients are associated with better outcome in the FUSCC cohort.

**Supplementary Figure 5.** AR and ESR1 activity in *KDM6A*<sup>Mut</sup> and *KDM6A*<sup>WT</sup> patients.

**Supplementary Table 1.** Clinical and demographic characteristics of the patients at baseline of public data sets.

**Supplementary Table 2.** Sources and details of gene signature.

| Cohorts            | FUSCC                                                                                                  | ZSHS                                                                                                                                                                            | MSKCC                                                                           | TCGA                                                                                                                                                    | IMvigor210                                                                                    | UC-GENOME                                                                                                                                                                               | MSK-IMPACT                                                            |
|--------------------|--------------------------------------------------------------------------------------------------------|---------------------------------------------------------------------------------------------------------------------------------------------------------------------------------|---------------------------------------------------------------------------------|---------------------------------------------------------------------------------------------------------------------------------------------------------|-----------------------------------------------------------------------------------------------|-----------------------------------------------------------------------------------------------------------------------------------------------------------------------------------------|-----------------------------------------------------------------------|
| Data collection    | 110 patients diagnosed with bladder and upper urinary tract cancer                                     | 215 patients diagnosed with bladder cancer who underwent radical cystectomy at Zhongshan Hospital of Fudan University from 2002 to 2014                                         | 1244 patients diagnosed with bladder and upper urinary tract cancer             | 412 patients diagnosed with bladder cancer                                                                                                              | 348 patients diagnosed with metastatic urothelial carcinoma treated by Atezolizumab           | 218 patients diagnosed with bladder and upper urinary tract cancer                                                                                                                      | 1,661 patients of different tumor types receiving checkpoint blockade |
| Exclusion criteria | 7 patients with non-urothelial histology, 2 samples with duplicate sampling                            | 60 patients without MIBC, 13 patients with non-urothelial carcinoma, and 10 specimens with dots lost on the tissue microarray (TMA) during the immunohistochemistry (IHC) assay | 24 patients with non-urothelial histology and 2 patients without data of gender | 3 patients without survival data, 4 patients without RNA-seq data, 10 patients receiving neoadjuvant chemotherapy, and 4 patients diagnosed with NMIBC. | 74 patients without available genomic data                                                    | 26 patients without available genomic and clinical data, 25 patients with non urothelial histology, and 1 patient without data of gender, and 43 patients did not receive immunotherapy | 199 patients diagnosed with urothelial carcinoma                      |
| Data analysis      | 101 patients included in the clinicopathological, radiological analysis with targeted sequencing data. | 132 patients included for IHC assay and survival analysis.                                                                                                                      | 1218 patients included in survival and genomic analysis.                        | 391 patients included in survival, genomic and transcriptomic analysis.                                                                                 | 274 patients included for evaluation of response to checkpoint blockade and genomic features. | 123 patients included for evaluation of genomic alteration and clinical features, with 109 patients available with adequate survival data.                                              | 199 patients included for survival analysis and genomic alteration.   |

**Supplementary Figure 1. Enrollment, clinicopathological features and inclusion criteria for FUSCC, ZSHS, TCGA, MSKCC, IMvigor210, UC-GENOME and MSKCC-IMPACT cohorts.**

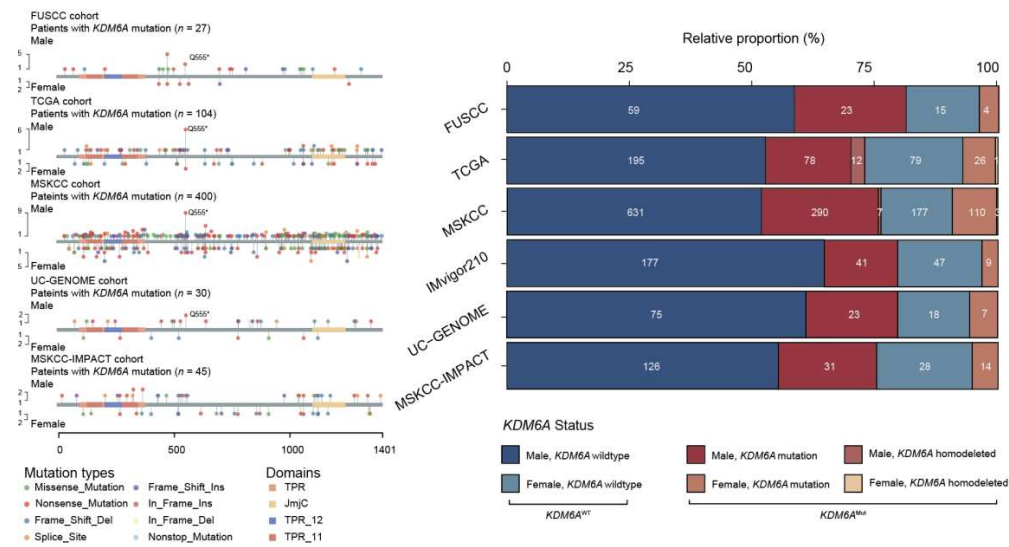

**Supplementary Figure 2. Mutational landscape of *KDM6A* in UC. (A)** Lollipop plot demonstrating the mutation loci of *KDM6A* in the FUSCC, TCGA, MSKCC, UC-GENOME and MSKCC-IMPACT cohorts. **(B)** Bar plot demonstrating the sexual distribution of *KDM6A* mutation status.

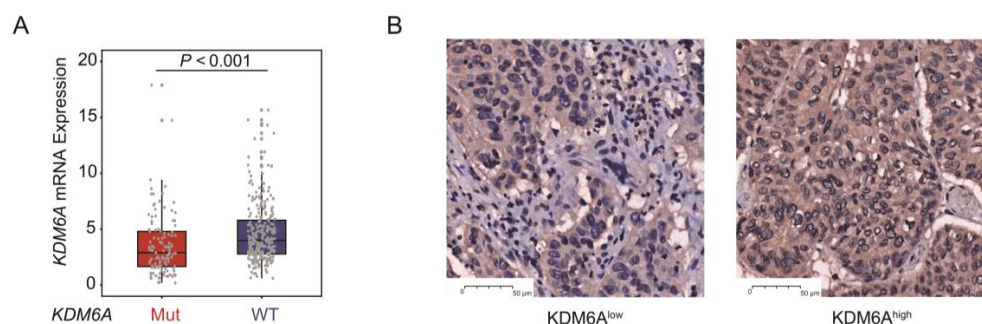

**Supplementary Figure 3. Immunohistochemistry characterization of  $KDM6A^{Mut}$**

**samples. (A)** Boxplot demonstrating the difference in transcriptomic expression of  $KDM6A$  in  $KDM6A^{Mut}$  and  $KDM6A^{WT}$  samples. **(B)** Representative images of immunohistochemistry of  $KDM6A$  in the tissue of urothelial bladder cancer.

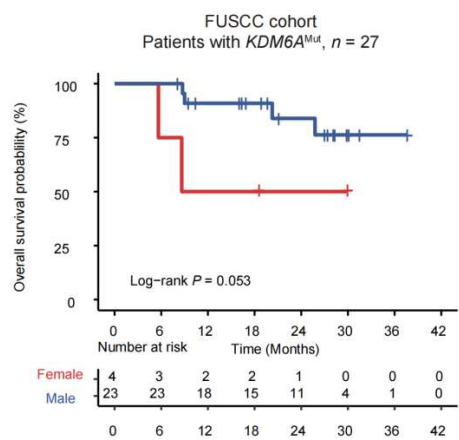

**Supplementary Figure 4. *KDM6A*<sup>Mut</sup> male patients are associated with better outcome in the FUSCC cohort.** Kaplan-Meier analyses of overall survival between male and female patients with *KDM6A* mutations of FUSCC cohort.

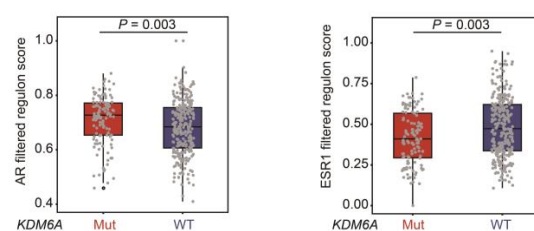

**Supplementary Figure 5. AR and ESR1 activity in  $KDM6A^{Mut}$  and  $KDM6A^{WT}$  patients.** Boxplot demonstrating the difference of AR and ESR1 filtered regulon activity in  $KDM6A^{Mut}$  and  $KDM6A^{WT}$  patients.

Supplementary Table 1. Clinical and Demographic Characteristics of the Patients at Baseline of Public Data Sets.

| Cohort                            | MSKCC cohort<br>(n = 1218) |                          | TCGA cohort<br>(n = 391) |                     | IMvigor210 cohort<br>(n = 274) |                   | UC-GENOME cohort<br>(n = 123) |                    | MSKCC-IMPACT cohort<br>(n = 199) |                  |
|-----------------------------------|----------------------------|--------------------------|--------------------------|---------------------|--------------------------------|-------------------|-------------------------------|--------------------|----------------------------------|------------------|
| Gender                            | Male                       | Female                   | Male                     | Female              | Male                           | Female            | Male                          | Female             | Male                             | Female           |
|                                   | 928                        | 290                      | 285                      | 106                 | 218                            | 56                | 98                            | 25                 | 157                              | 42               |
| Age                               |                            |                          |                          |                     |                                |                   |                               |                    |                                  |                  |
| Median age (range) – yr.          | 66<br>(18-92)              | 67<br>(25-88)            | 68<br>(34-90)            | 73<br>(43-90)       |                                |                   | 67<br>(28-85)                 | 72<br>(53-83)      | 68<br>(32-89)                    | 70<br>(43-83)    |
| Distribution - no. (%)            |                            |                          |                          |                     |                                |                   |                               |                    |                                  |                  |
| <65                               | 373<br>(40.2%)             | 103<br>(35.5%)           | 108<br>(37.9%)           | 37<br>(34.9%)       | NA                             |                   | 41<br>(41.8%)                 | 6<br>(24.0%)       | 61<br>(38.9%)                    | 17<br>(40.5%)    |
| ≥65                               | 463<br>(49.9%)             | 148<br>(51.0%)           | 177<br>(62.1%)           | 69<br>(65.1%)       |                                |                   | 57<br>(58.2%)                 | 19<br>(76.0%)      | 96<br>(61.1%)                    | 25<br>(59.5%)    |
| NA                                | 92<br>(9.9%)               | 39<br>(13.5%)            | 0                        | 0                   |                                |                   | 0                             | 0                  | 0                                | 0                |
| Median OS (range) – mo.           | 90.2<br>(0-104.9)          | Not Reached<br>(0-103.6) | 35.0<br>(0.4-165.9)      | 31.2<br>(0.6-163.2) | 9.6<br>(0.2-24.5)              | 9.3<br>(0.4-23.5) | 56.1<br>(5.3-209.2)           | 37.8<br>(3.8-88.3) | 16.0<br>(0-43.0)                 | 15.0<br>(0-26.0) |
| ECOG Performance Status - no. (%) |                            |                          |                          |                     |                                |                   |                               |                    |                                  |                  |
| 0                                 |                            |                          | 24<br>(8.4%)             | 6<br>(5.7%)         | 84<br>(38.5%)                  | 22<br>(39.3%)     | 41<br>(41.8%)                 | 9<br>(36.0%)       |                                  |                  |
| 1                                 |                            | NA                       | 35<br>(12.3%)            | 17<br>(16.0%)       | 120<br>(55.1%)                 | 31<br>(55.4%)     | 41<br>(41.8%)                 | 10<br>(40.0%)      |                                  |                  |
| ≥2                                |                            |                          | 10<br>(3.5%)             | 4<br>(3.8%)         | 14<br>(6.4%)                   | 3<br>(5.3%)       | 16<br>(16.4%)                 | 6<br>(24.0%)       | NA                               |                  |
| NA                                |                            |                          | 216<br>(75.8%)           | 79<br>(74.5%)       | 0                              | 0                 | 0                             | 0                  |                                  |                  |
| KDM6A Mutation Status - no. (%)   |                            |                          |                          |                     |                                |                   |                               |                    |                                  |                  |
| KDM6A <sup>Mut</sup>              | 297<br>(32.0%)             | 113<br>(39.0%)           | 90<br>(31.6%)            | 27<br>(25.5%)       | 41<br>(18.8%)                  | 9<br>(16.1%)      | 23<br>(23.5%)                 | 7<br>(28.0%)       | 31<br>(19.7%)                    | 14<br>(33.3%)    |
| KDM6A <sup>WT</sup>               | 631<br>(68.0%)             | 177<br>(61.0%)           | 195<br>(68.4%)           | 79<br>(74.5%)       | 177<br>(81.2%)                 | 47<br>(83.9%)     | 75<br>(76.5%)                 | 18<br>(72.0%)      | 126<br>(80.3%)                   | 28<br>(66.7%)    |

Abbreviations: ECOG: Eastern Cooperative Oncology Group; Mut, mutation; WT, wild type; NA, not available.

Supplementary Table 2. Sources and Details of Gene Signature.

| Signature                             | Source         |
|---------------------------------------|----------------|
| AR filtered regulon signature         | PMID: 36273937 |
| ESR1 filtered regulon signature       | PMID: 36273937 |
| Tertiary lymphoid structure signature | PMID: 23097687 |
| Angiogenesis signature                | PMID: 36494005 |
